# Supplementary material
Source: PubMed Central journal article supplement (PMC8786218)

# Figure S2

A

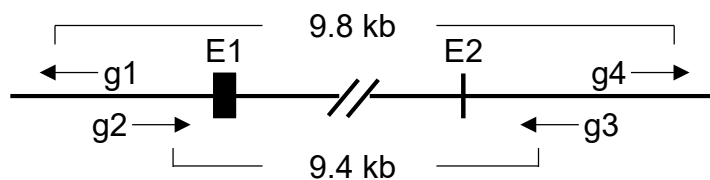

B

Remnant of g1    Remnant of g4

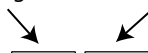

Perfect Junction GGGCGGGTACTAAGGTGGGCTCCATCCCTGAGCCCAAGGCGGGCCGACAAGCTGCAGCGTGTCCCCG**GT**GTAGGGTGGGAATGAAGGCTCCTGTTTTCTTCCCTACCCAGTGTCC  
 Lrp1<sup>KO</sup>R1 GGGCGGGTACTAAGGTGGGCTCCATCCCTGAGCCCAAGGCGGGCCGACAAGCTGCAGCGTGTCCCC-----GCTCTGTTTTCTTCCCTACCCAGTGTCC  
 Lrp1<sup>KO</sup>R3 GGGCGGGTACTAAGGTGGGCTCCATCCCTGAGCCCAAGGCGGGCCGACAAGCTGCAGCGTGTCCCCG**GT**GTAGGGTGGGAATGAAGGCTCCTGTTTTCTTCCCTACCCAGTGTCC  
 Lrp1<sup>KO</sup>R5 GGGCGGGTACTAAGGTGGGCTCCATCCCTGAGCCCAAGGCGGGCCGACAAGCTGCAGCGTGTCCCCG**GT**GTAGGGTGGGAATGAAGGCTCCTGTTTTCTTCCCTACCCAGTGTCC  
 Lrp1<sup>KO</sup>R6 GGGCGGGTACTAAGGTGG-----GCTCTGTTTTCTTCCCTACCCAGTGTCC

C

Remnant of g2    Remnant of g3

Perfect Junction GGGTTTCCCAAGGAAATCAGGCCTCCGCCTAGACAGCGGCTCGGGACCCCA**TT**TAAGTGGTGTAAATCAGAGGCAGCTGTTTAAACTGGGAGAAAGGTCCCCACCCAGCCTTCACCC  
 Lrp1<sup>KO</sup>R1 GGGTTTCCCAAGGAAATCAGGCCTCCGCCTAGACAGCGGCTCGGGACCCCA**(NN)**TAAGTGGTGTAAATCAGAGGCAGCTGTTTAAACTGGGAGAAAGGTCCCCACCCAGCCTTCACCC  
 Lrp1<sup>KO</sup>R2 GGGTTTCC-----TTCACCC  
 Lrp1<sup>KO</sup>R2 -----additional 46 bp deletion from g2-----additional 205 bp deletion from g3-----  
 Lrp1<sup>KO</sup>R4 GGGTTTCCCAAGGAAATCAGGCCTCCGCCTAGACAGCGGCTCGGG-----TGTAAATCAGAGGCAGCTGTTTAAACTGGGAGAAAGGTCCCCACCCAGCCTTCACCC  
 Lrp1<sup>KO</sup>R4 GGGTTTCCCAAGGAAATCAGGCCTCCGCCTAGACAGCGGCTCGGGACCC-----additional 223 bp deletion from g3-----  
 Lrp1<sup>KO</sup>R5 GGGTTTCCCAAGGAAATCAGGCCTCCGCCTAGACAG-----AGGCAGCTGTTTAAACTGGGAGAAAGGTCCCCACCCAGCCTTCACCC  
 Lrp1<sup>KO</sup>R6 GGGTTTCCCAAGGAAATCAGGCCTCCGCCTAGACAGCGGCTCGGGACCCCA**TT**TAAGTGGTGTAAATCAGAGGCAGCTGTTTAAACTGGGAGAAAGGTCCCCACCCAGCCTTCACCC  
 Lrp1<sup>KO</sup>R3 8kb deletion from intron 1 to g3. Exon 1 is intact and Exon 2 is deleted

**(NN)** 223 bp downstream of g2 was kept

D

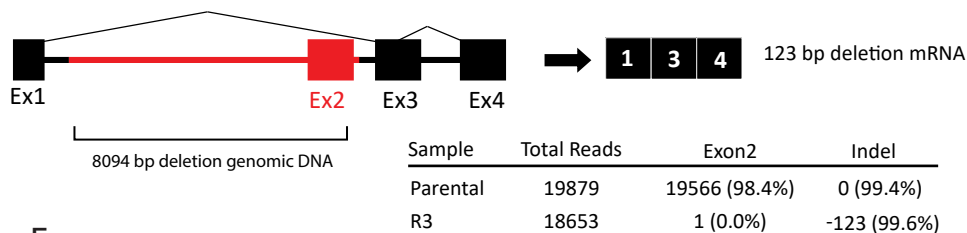

E

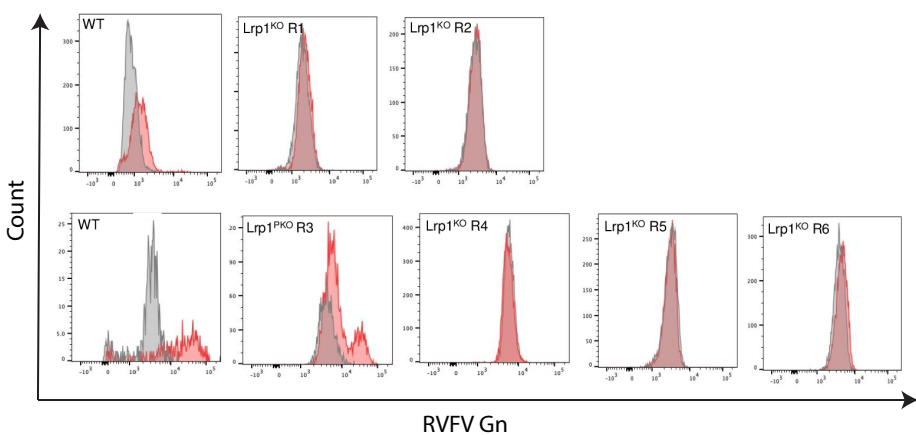

H

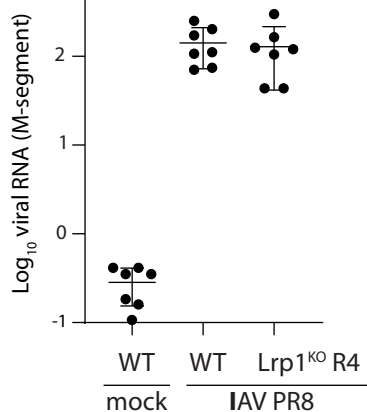

I

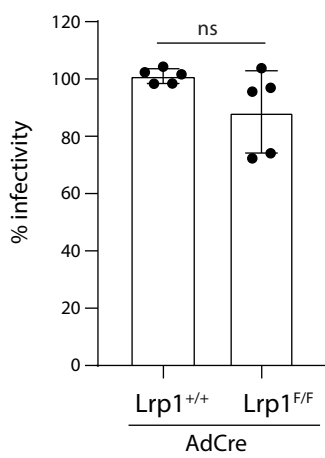

F

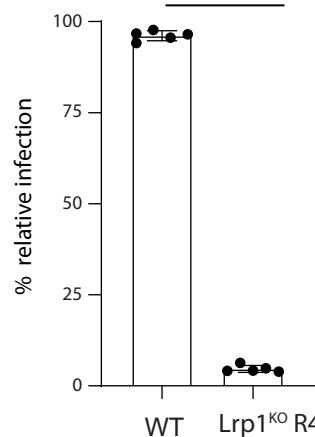

G

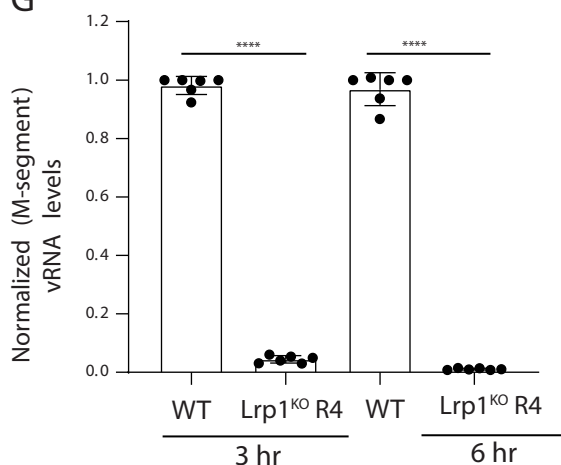

Supplement: NIHMS1742896-supplement-Fig_S2.pdf [file NIHMS1742896-supplement-Fig_S2.pdf]
