# Supplementary material
Source: PubMed Central journal article supplement (PMC8786218)
Supplement: NIHMS1742896-supplement-Fig_S9.pdf [file NIHMS1742896-supplement-Fig_S9.pdf]

**Figure S9**

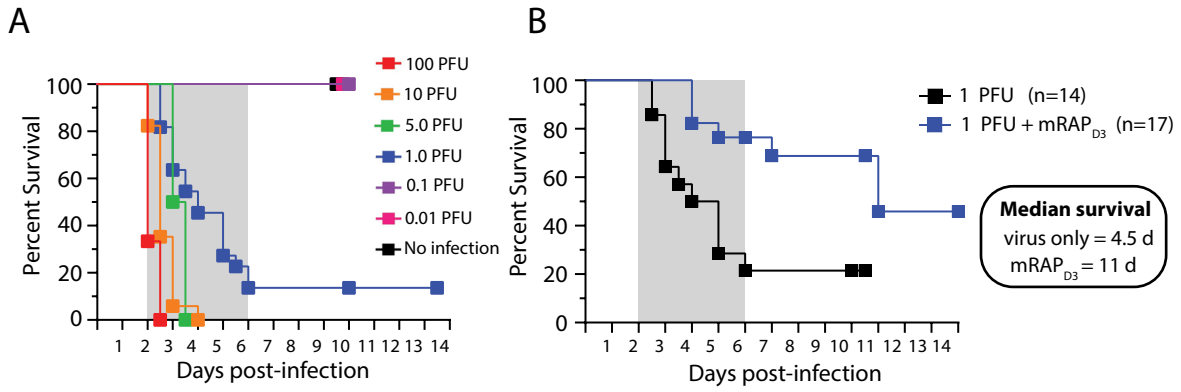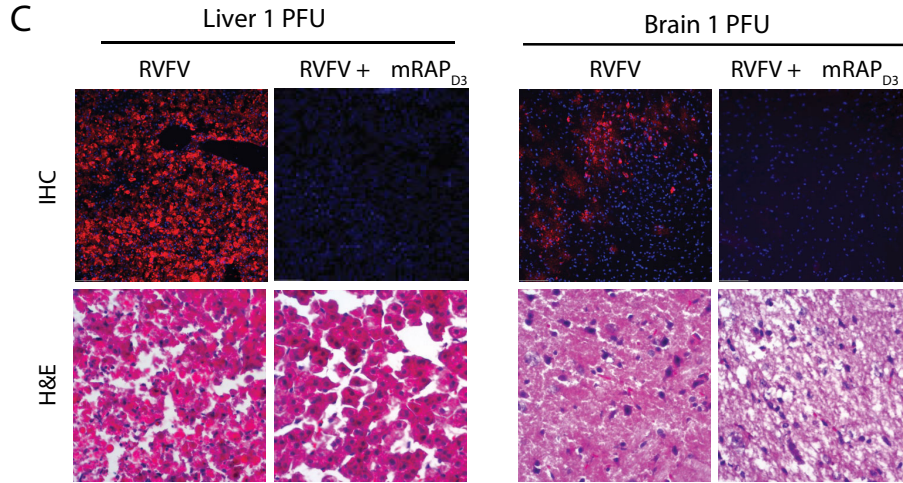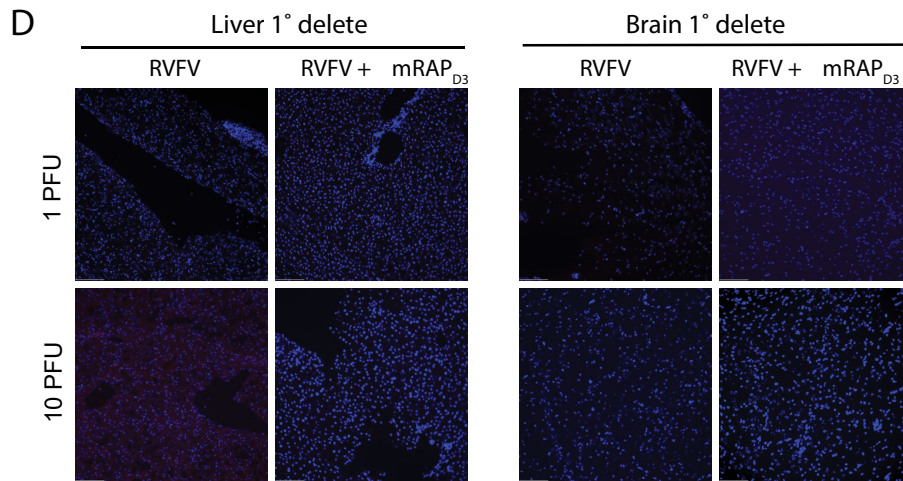

**E** Anti-RVFV serum titers at 14 dpi in surviving mRAP<sub>D3</sub> treated mice

| 10 PFU | 1 PFU  |
|--------|--------|
| 1:800  | 1:50   |
| 1:800  | 1:50   |
| 1:100  | 1:6400 |
| 1:800  | 1:400  |
| 1:100  | 1:100  |
| 1:50   | 1:200  |
| 1:50   | -      |

Positive cutoff is determined as 2 STDEV above the average of the negative control wells
