# Supplementary material
Source: PubMed Central journal article supplement (PMC8786218)

**Figure S1**

**A**

time post infection

|          | 0h | 12h | 24h | 36h | 48h |
|----------|----|-----|-----|-----|-----|
| MOI 0    | 0  | 0   | 0   | 0   | 0   |
| MOI 0.01 | 0  | 5   | 10  | 75  | 90  |
| MOI 0.1  | 0  | 5   | 75  | 90  | 100 |
| MOI 1.0  | 0  | 20  | 100 | 100 | 100 |

**B**

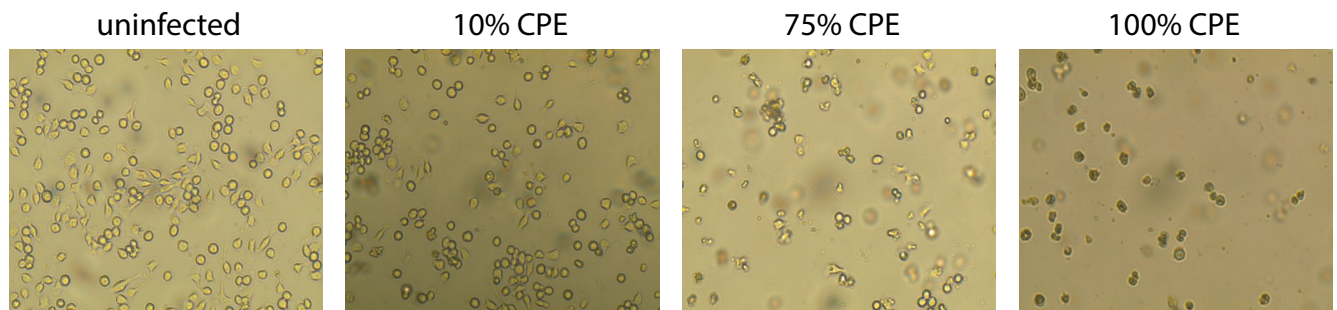

**C**

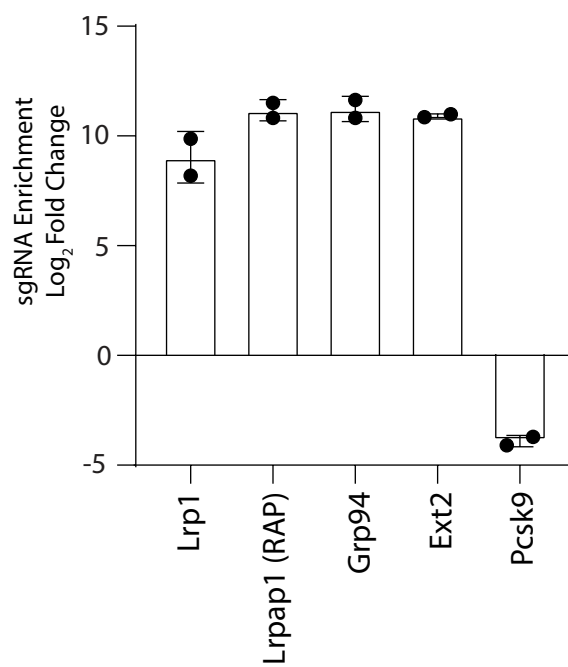

Supplement: NIHMS1742896-supplement-Fig_S1.pdf [file NIHMS1742896-supplement-Fig_S1.pdf]

**Figure S3**

**A**

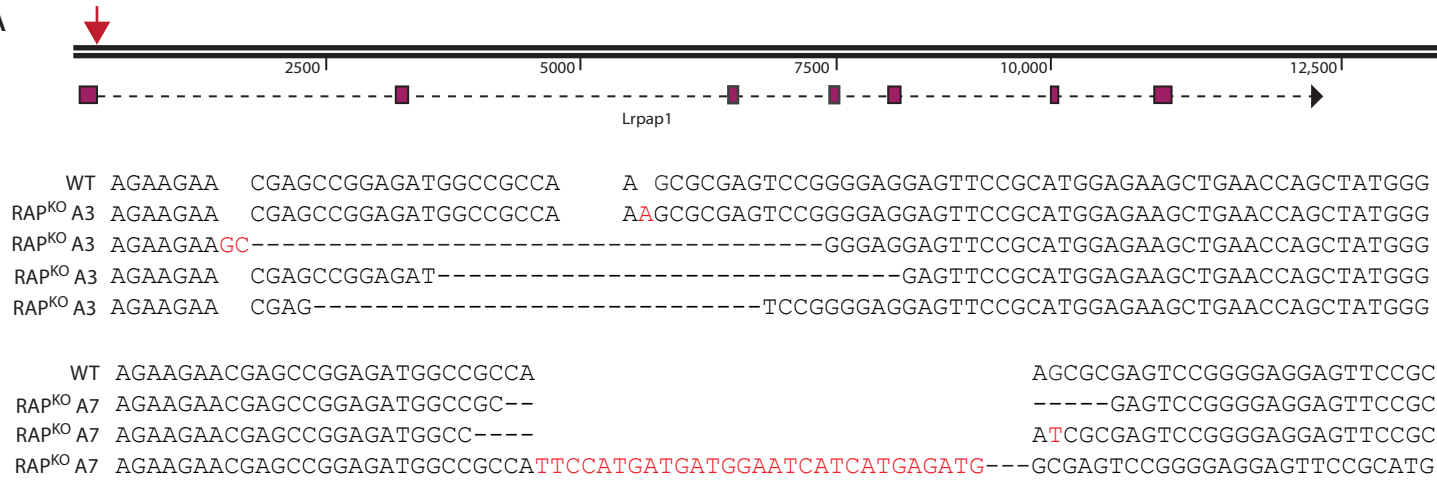

**B**

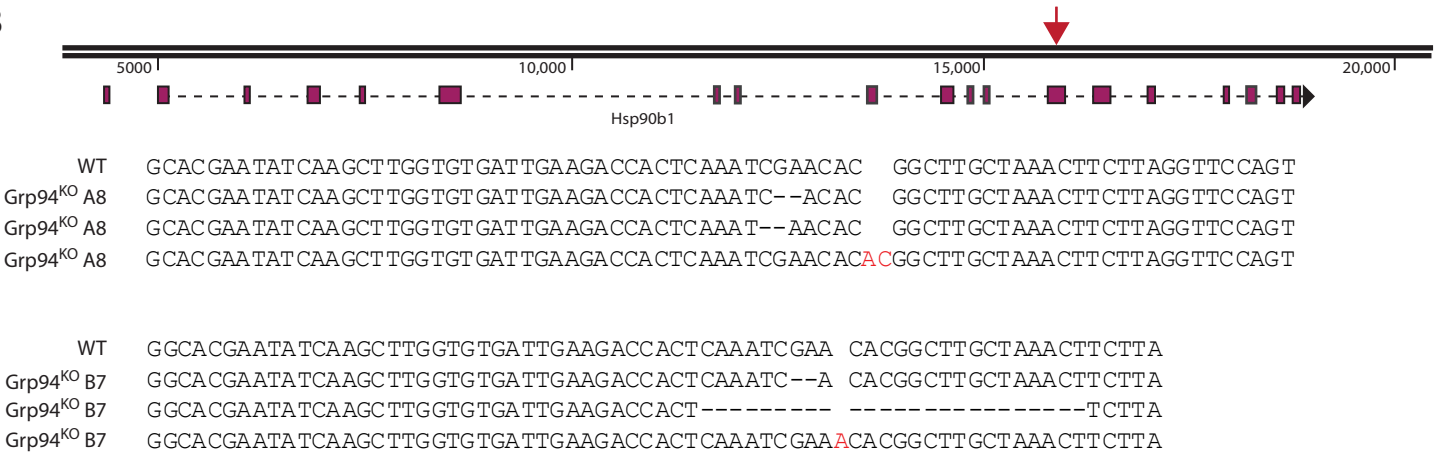

**C**

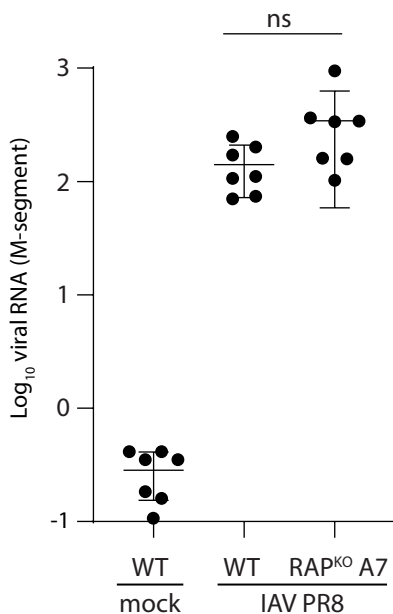

**D**

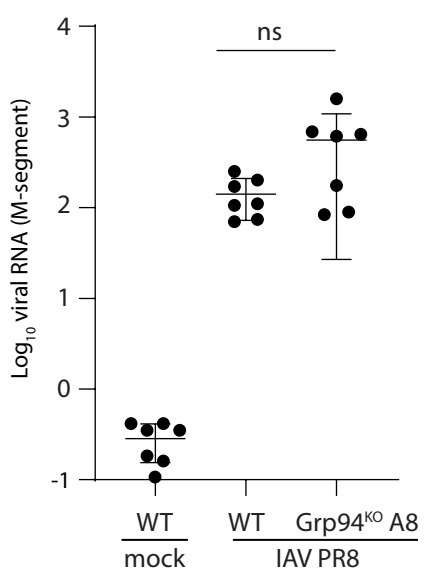

Supplement: NIHMS1742896-supplement-Fig_S3.pdf [file NIHMS1742896-supplement-Fig_S3.pdf]

**Figure S4**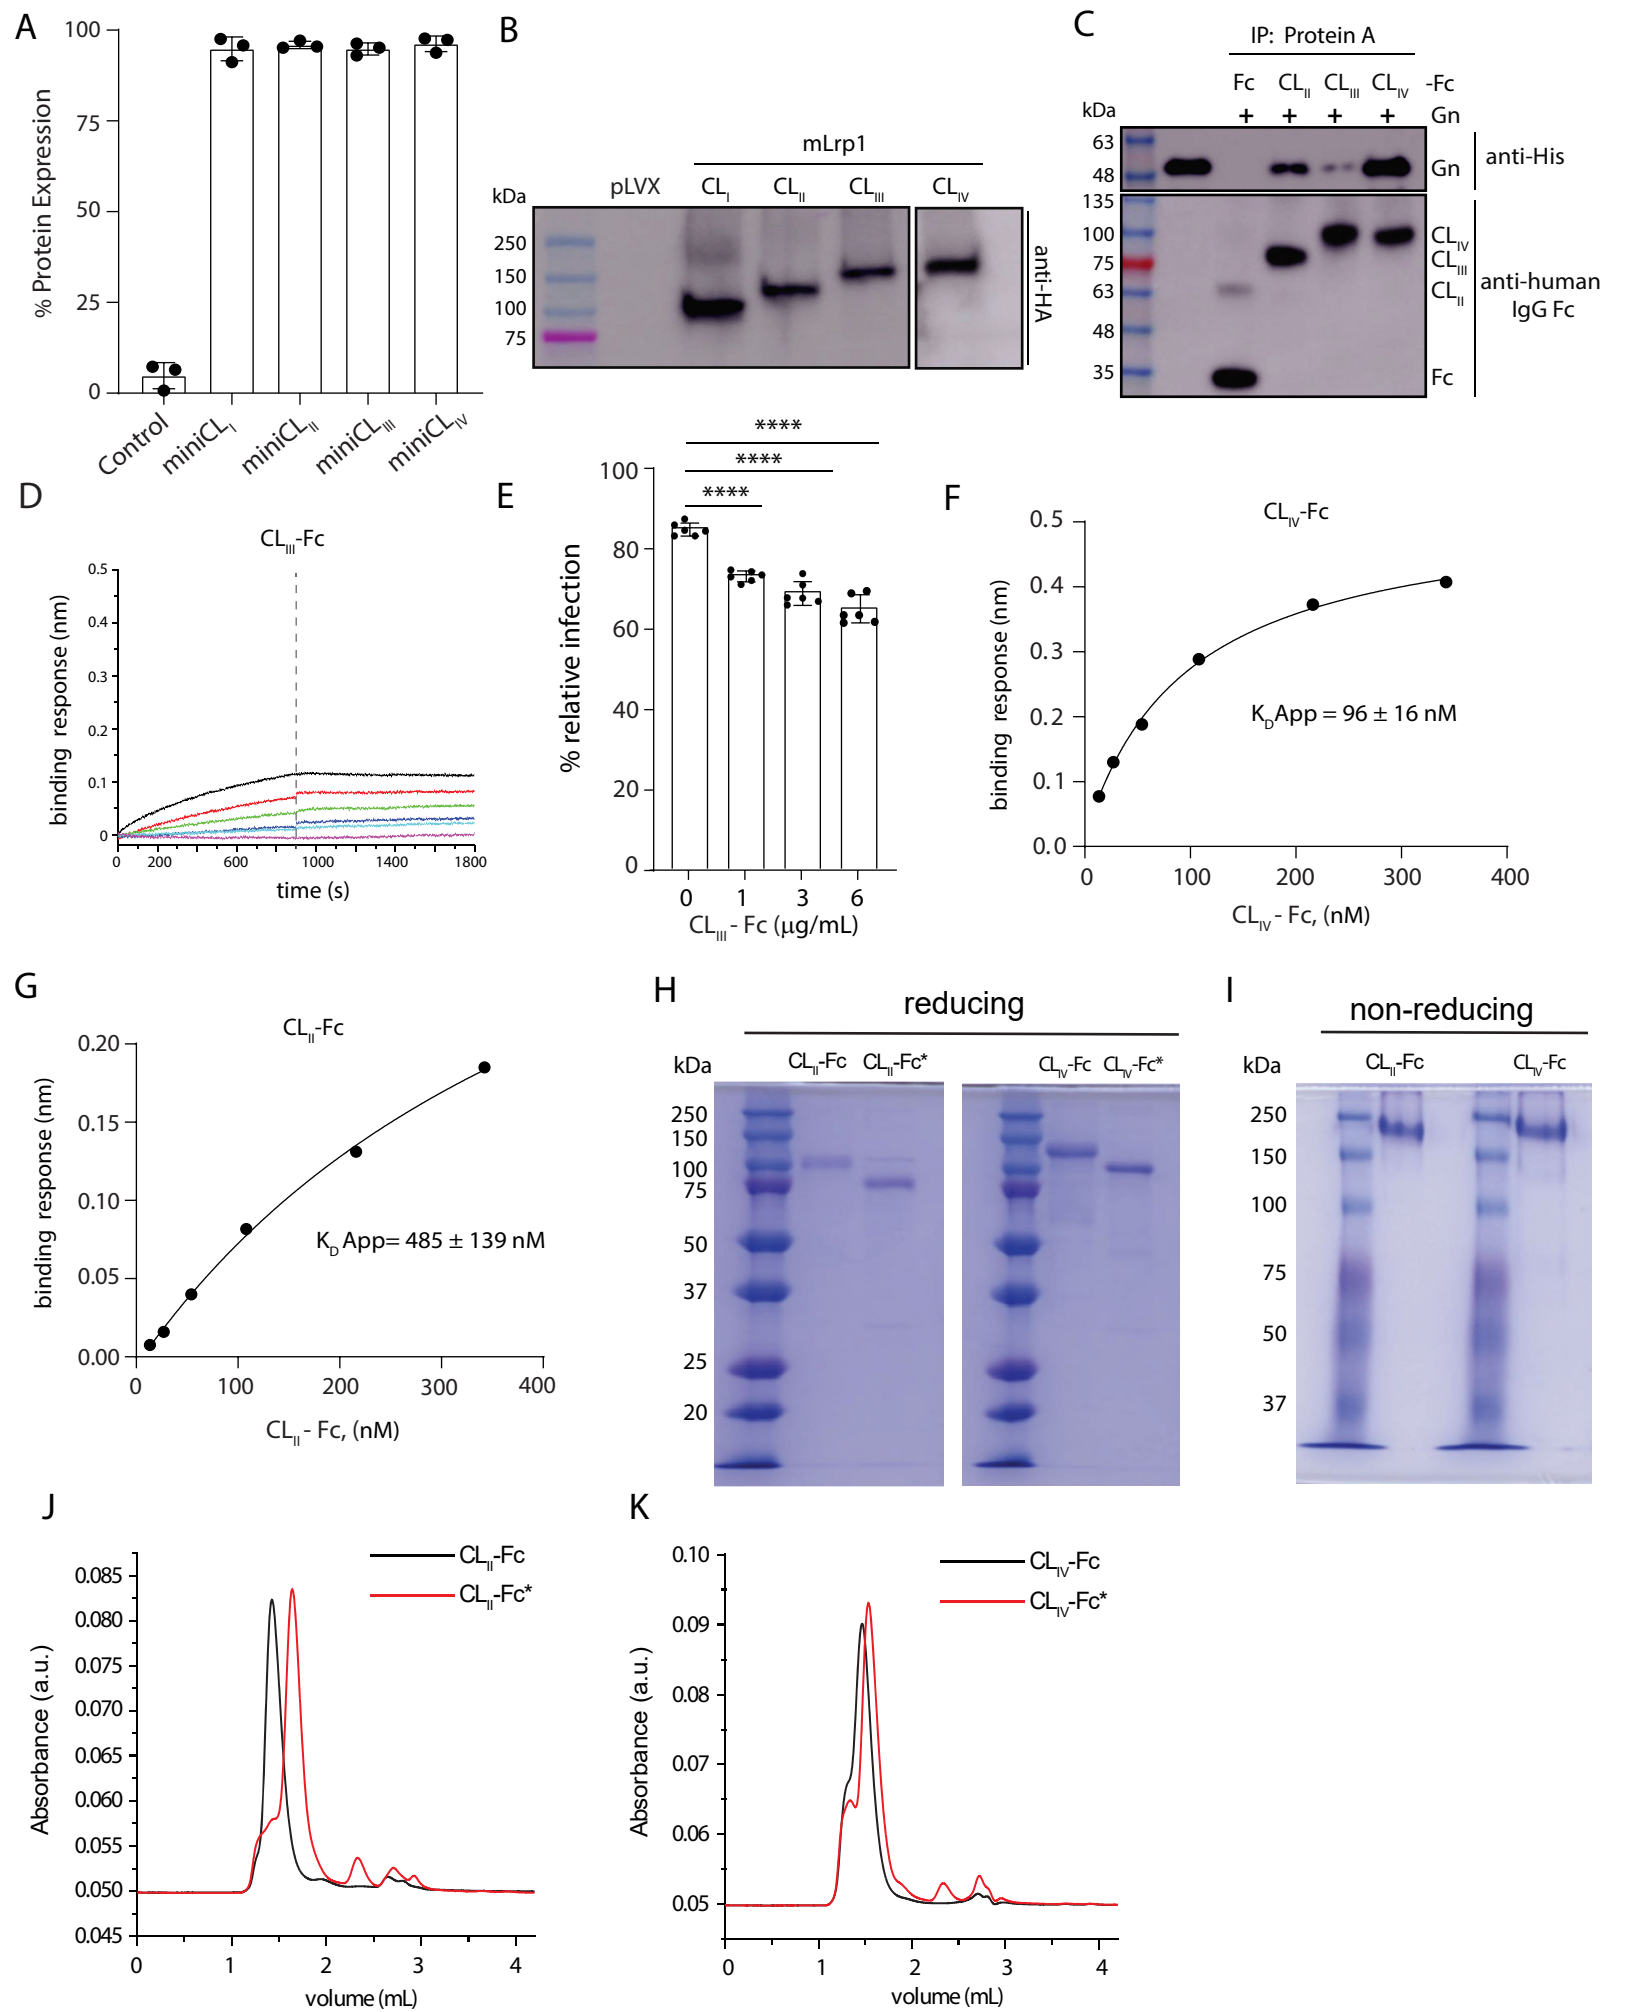

Supplement: NIHMS1742896-supplement-Fig_S4.pdf [file NIHMS1742896-supplement-Fig_S4.pdf]

# Figure S5

A

CL<sub>II</sub>-Fc : Denaturing LC-MS

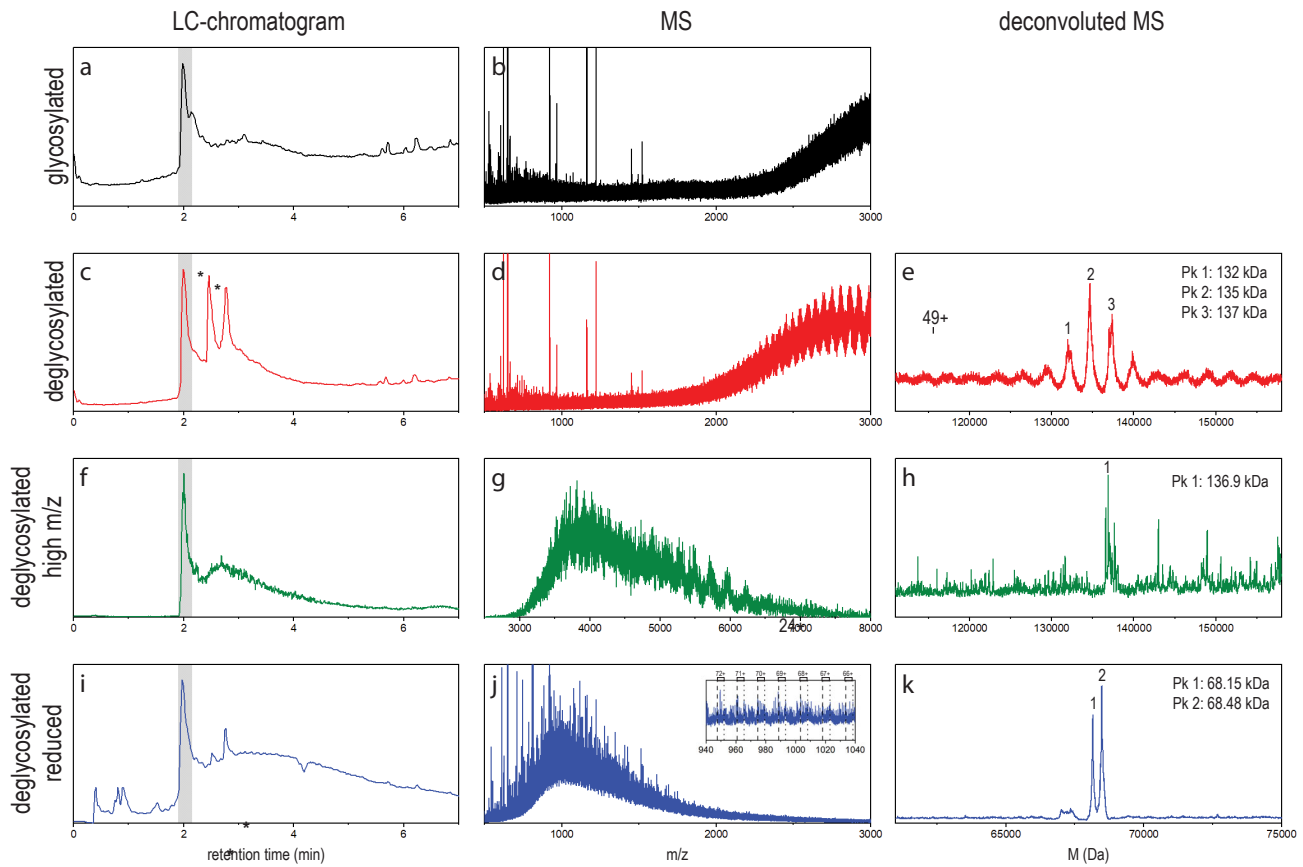

B

CL<sub>IV</sub>-Fc : Denaturing LC-MS

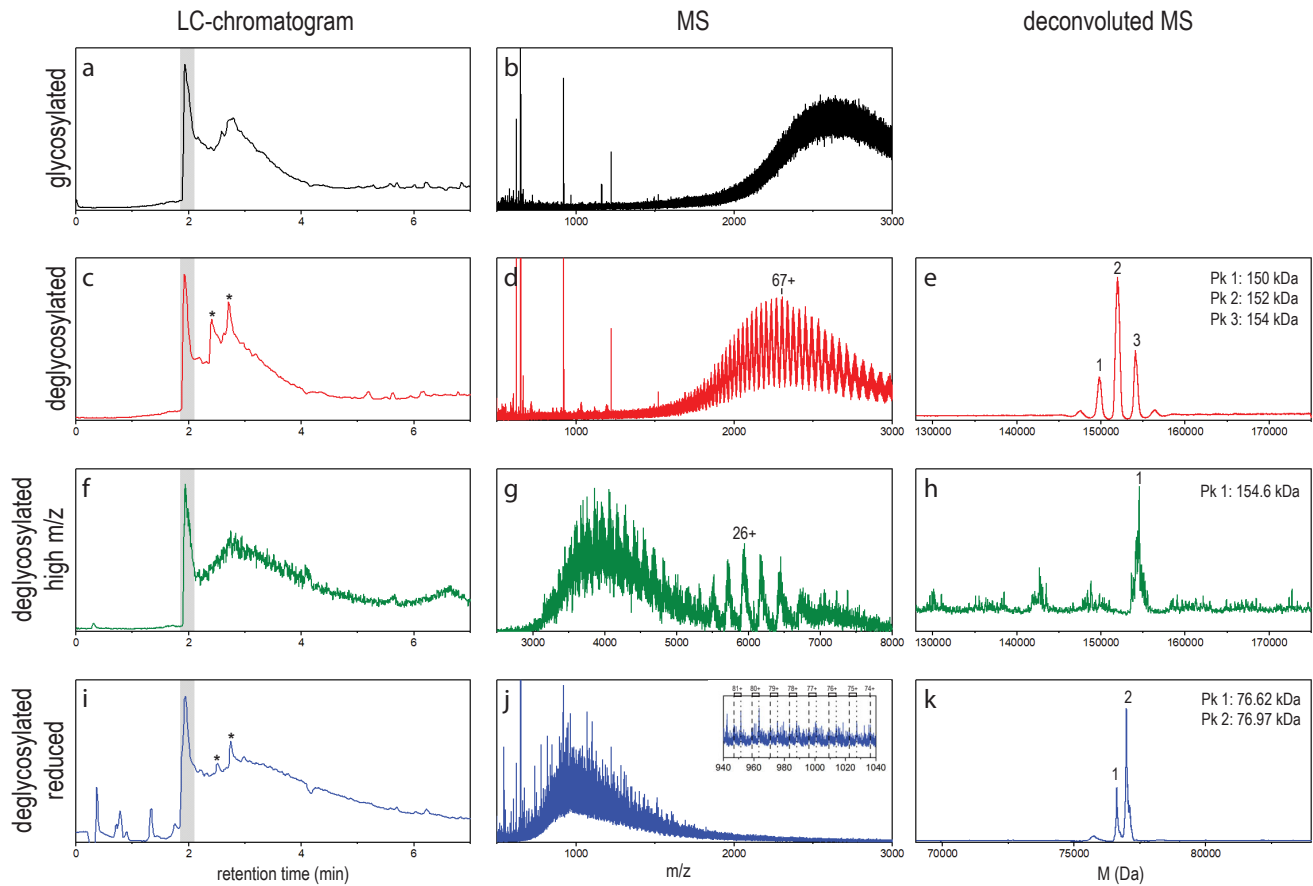

Supplement: NIHMS1742896-supplement-Fig_S5.pdf [file NIHMS1742896-supplement-Fig_S5.pdf]

# Figure S6

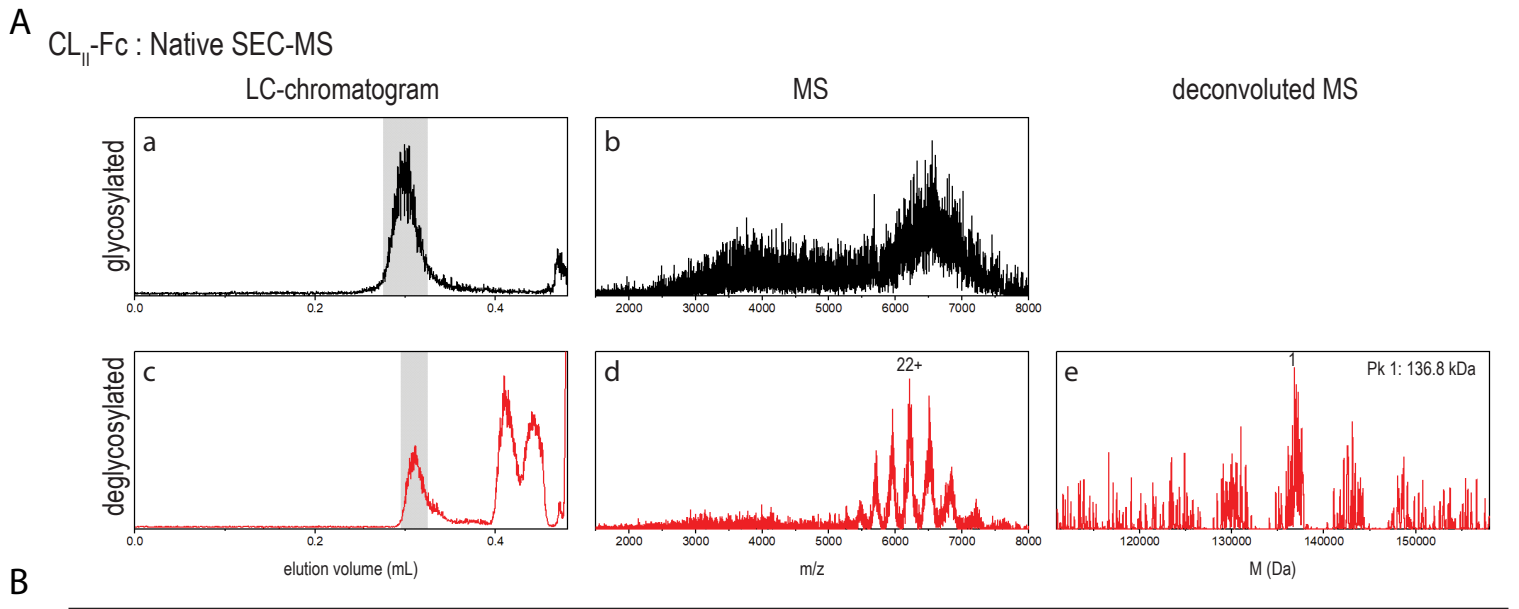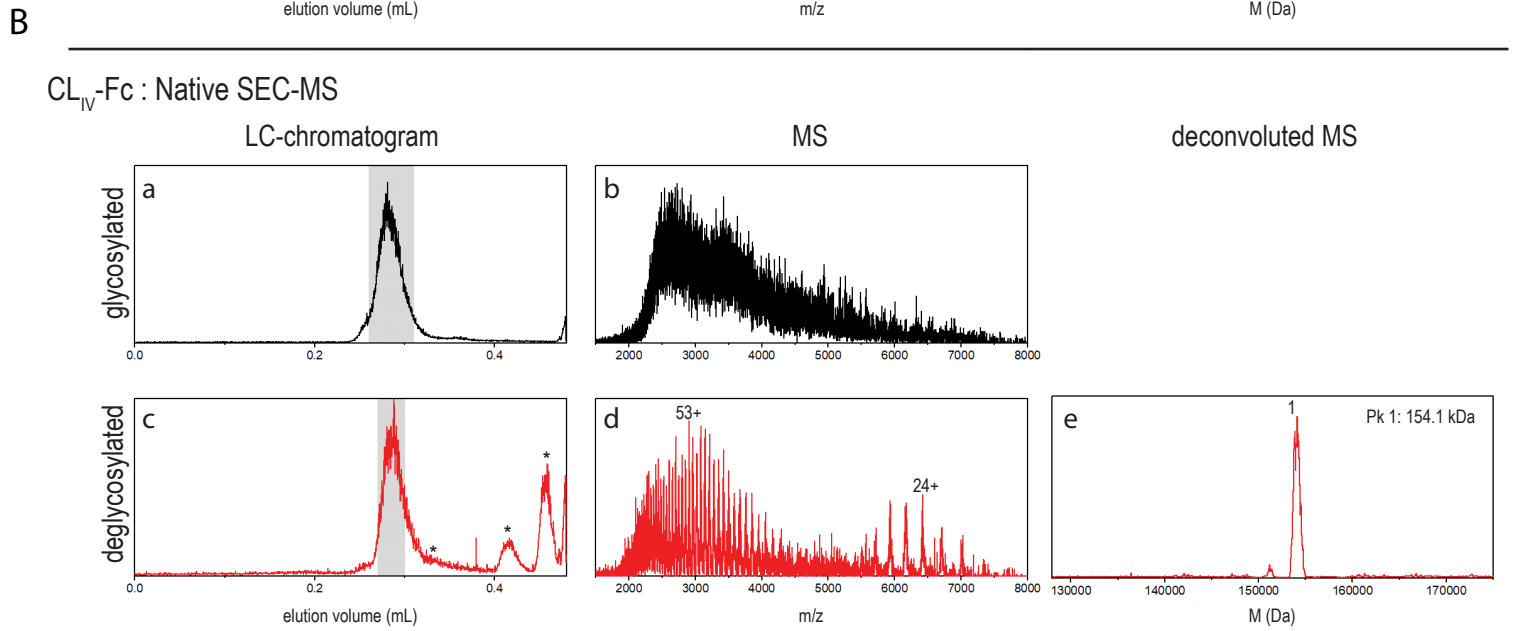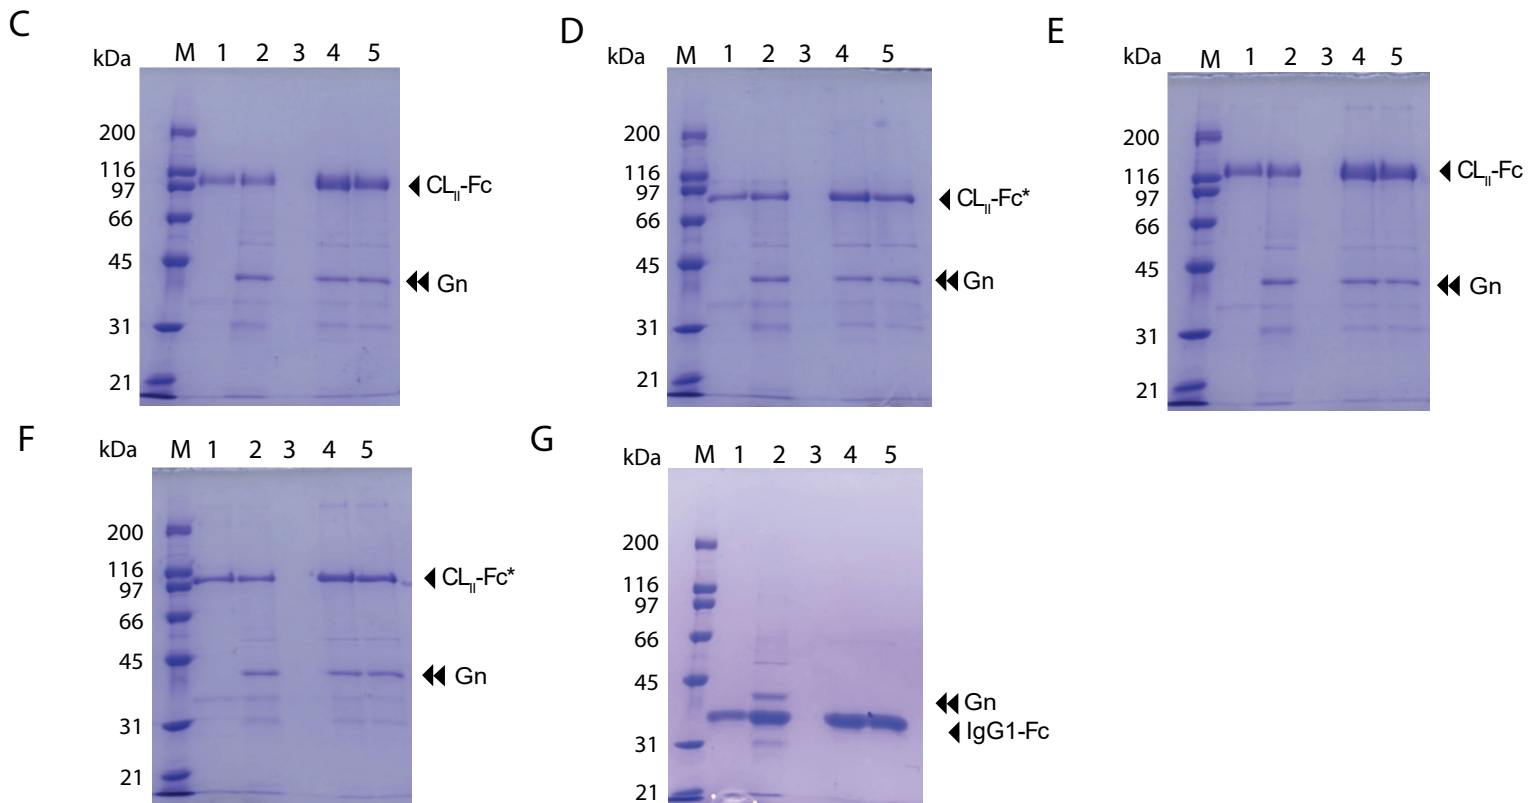

Supplement: NIHMS1742896-supplement-Fig_S6.pdf [file NIHMS1742896-supplement-Fig_S6.pdf]

**Figure S7****A**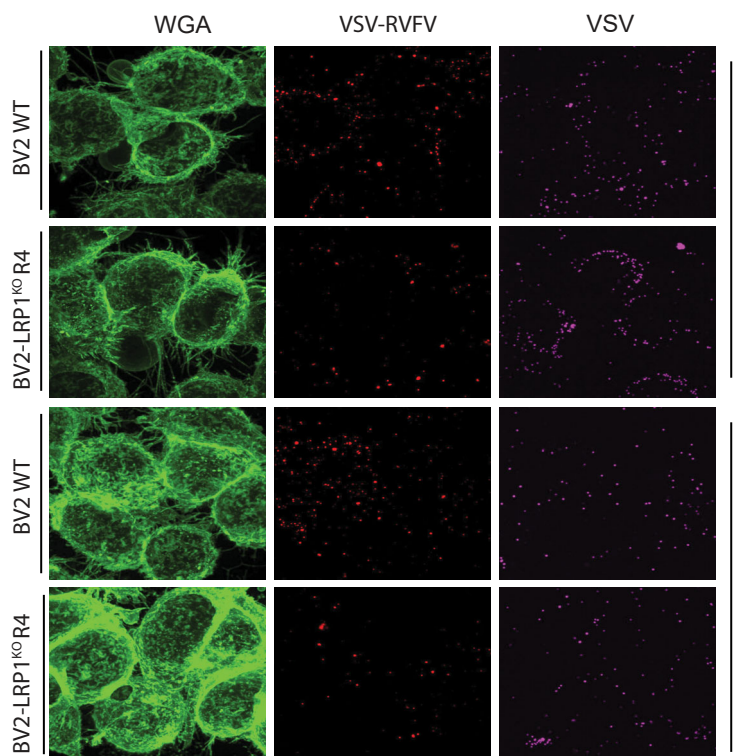**B**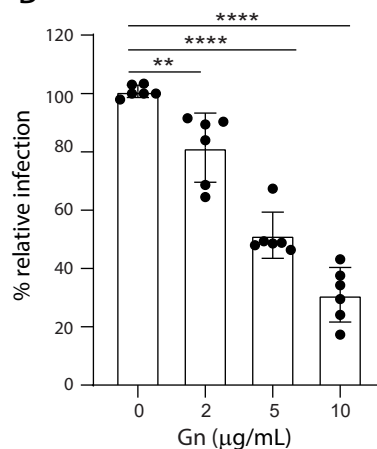**C**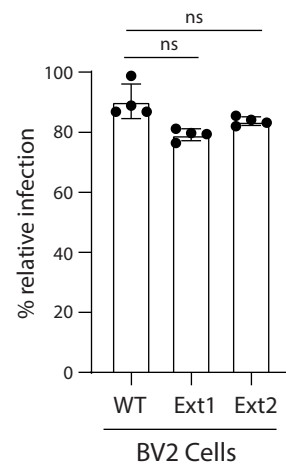**D**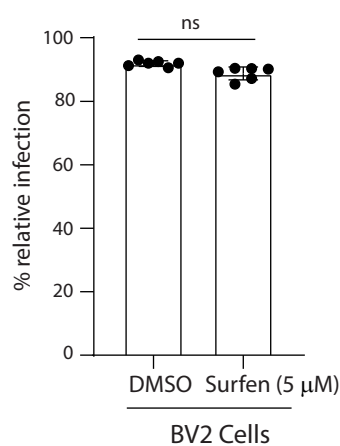**E**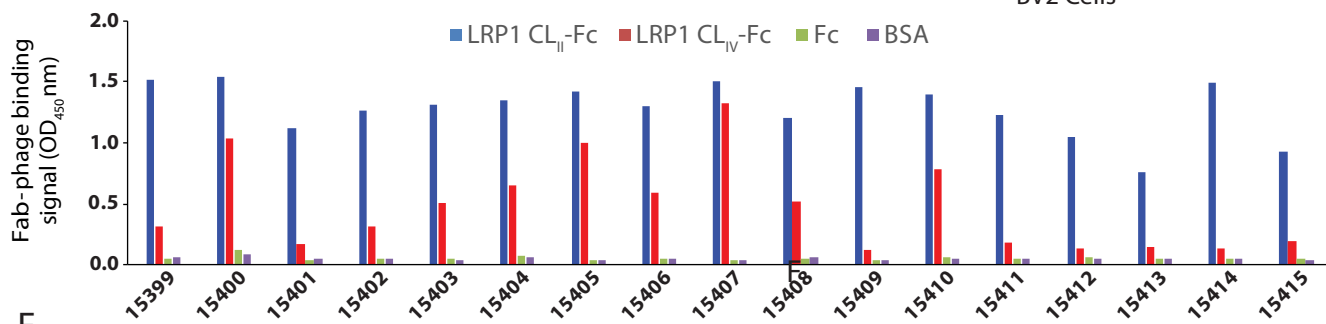**F**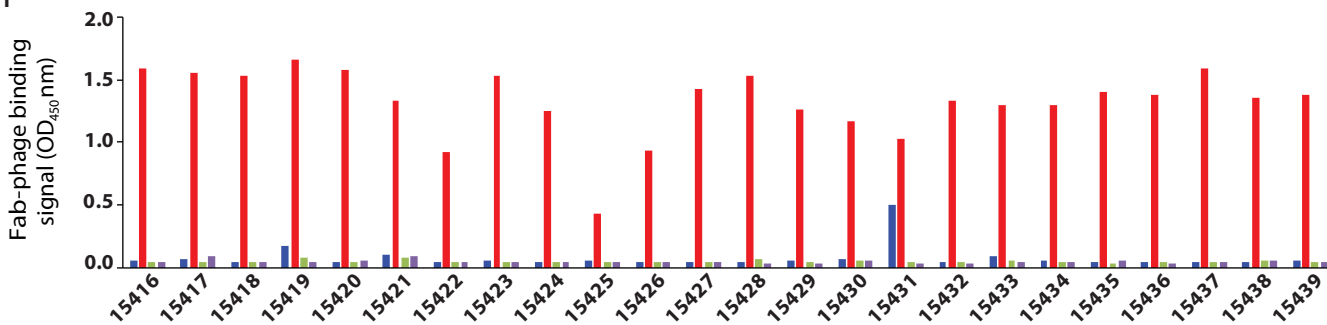**G**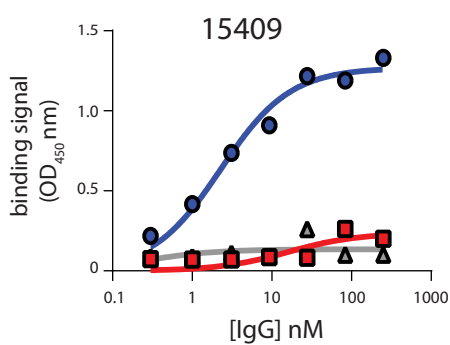**H**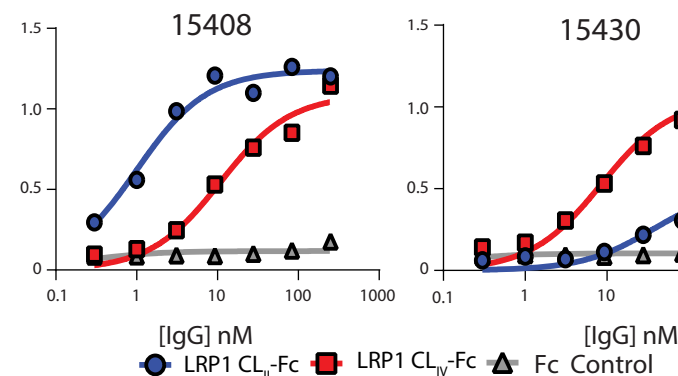**I**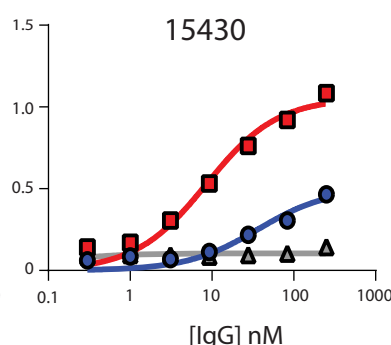**J**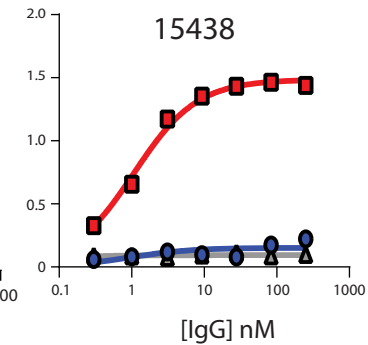

Supplement: NIHMS1742896-supplement-Fig_S7.pdf [file NIHMS1742896-supplement-Fig_S7.pdf]

**Figure S8**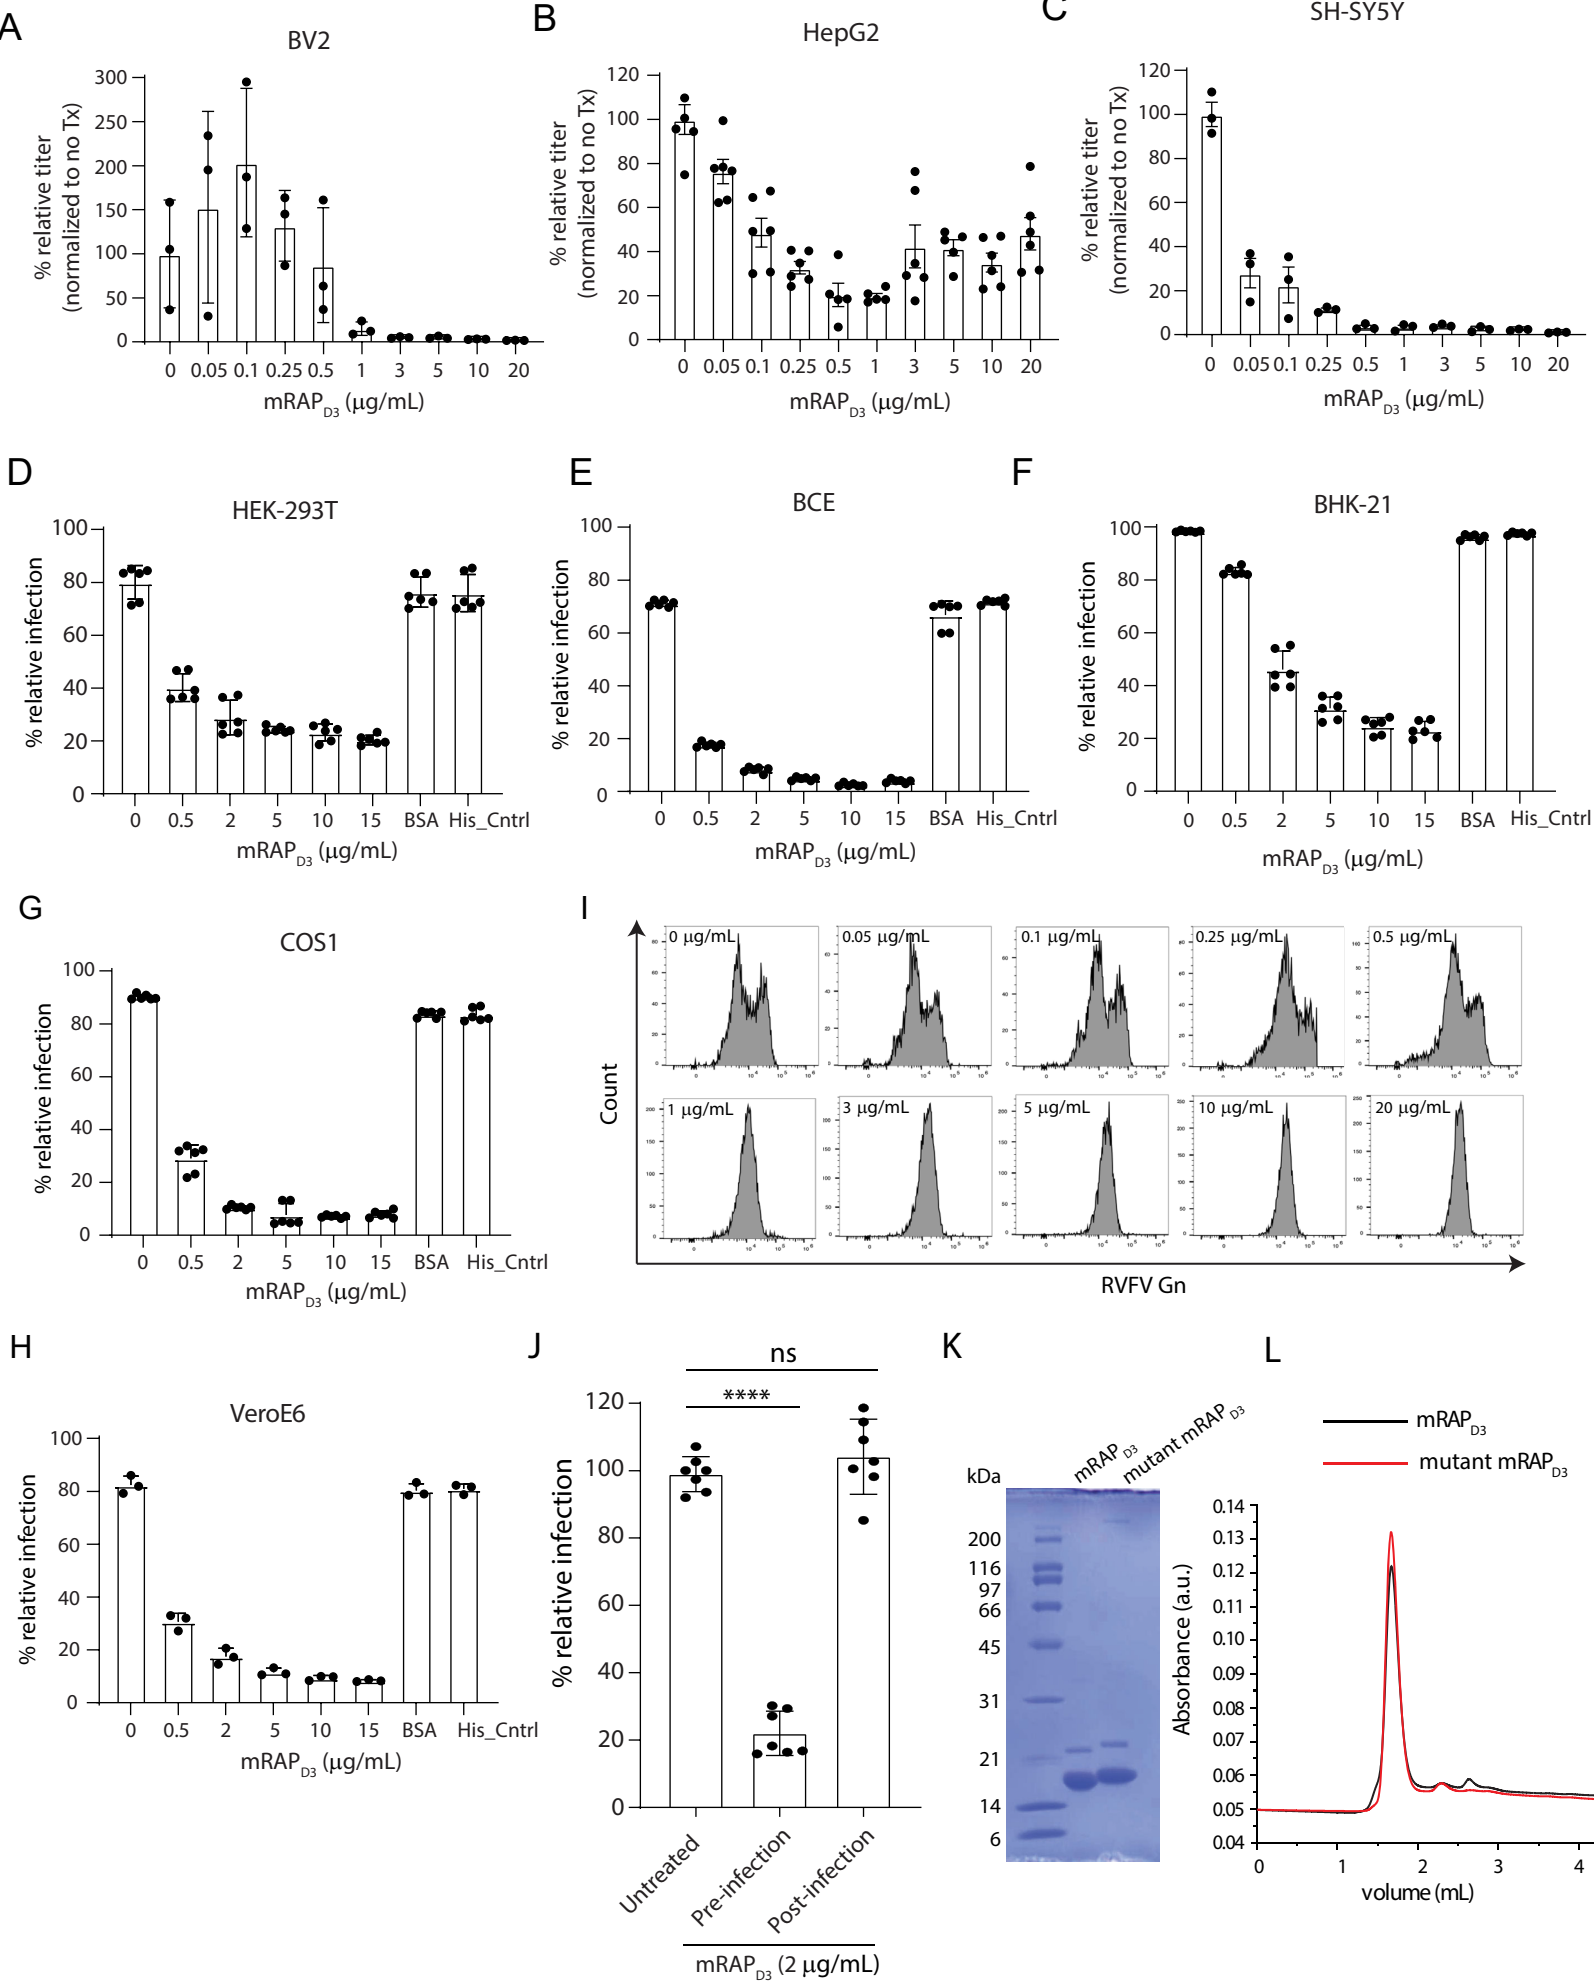

Supplement: NIHMS1742896-supplement-Fig_S8.pdf [file NIHMS1742896-supplement-Fig_S8.pdf]
